# Supplementary figures and images for: Nuclei determine the spatial origin of mitotic waves
Source: eLife journal article supplement (doi:10.7554/elife.52868), 2020-05-26

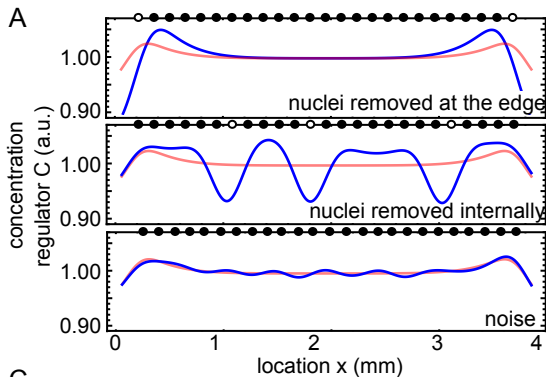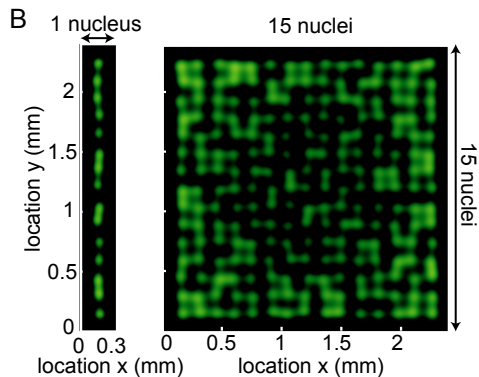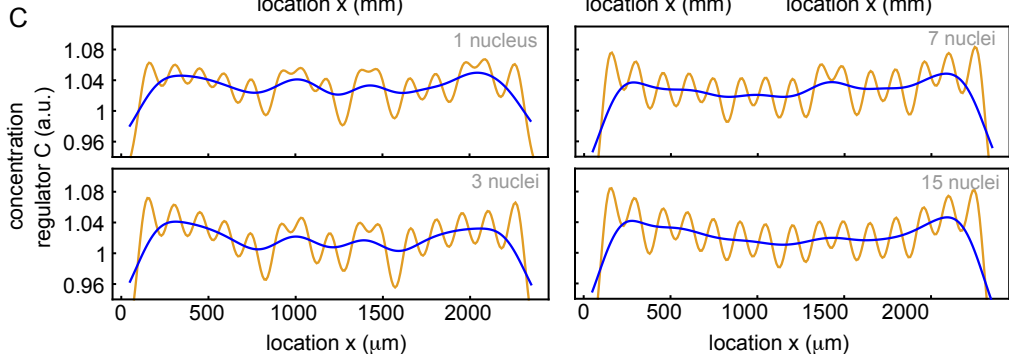

Supplement: supp [file elife-52868-supp-v1.zip]

A

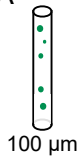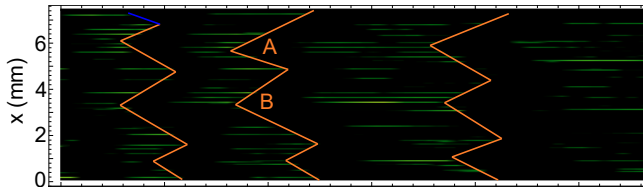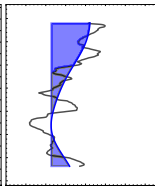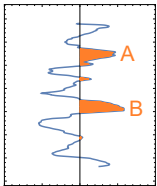

B

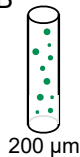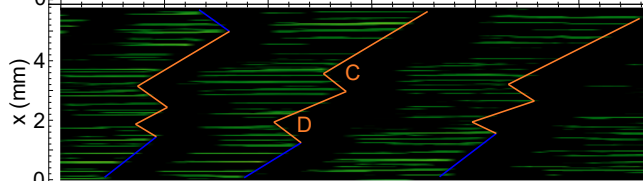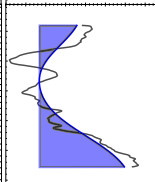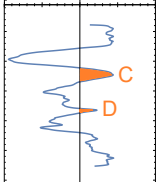

C

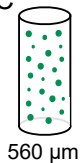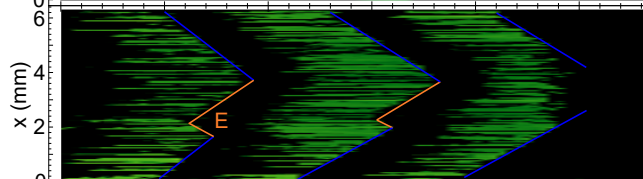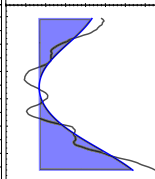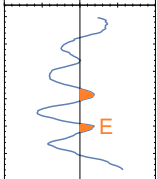

time (min)

Supplement: supp [file elife-52868-supp-v1.zip]

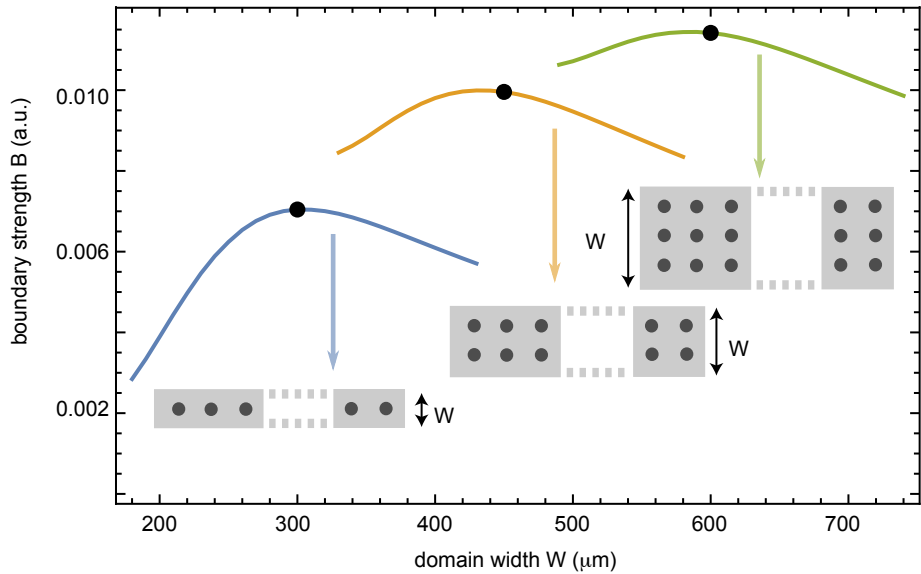

Supplement: supp [file elife-52868-supp-v1.zip]

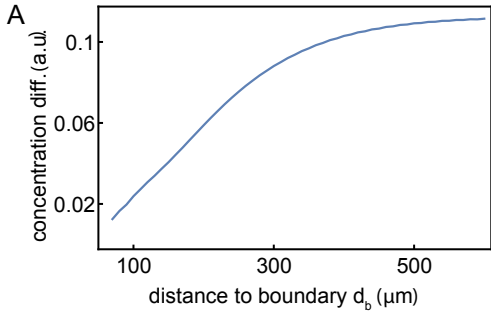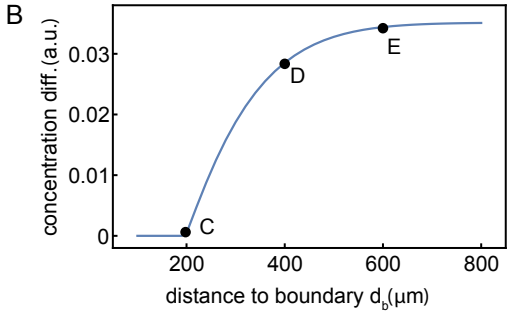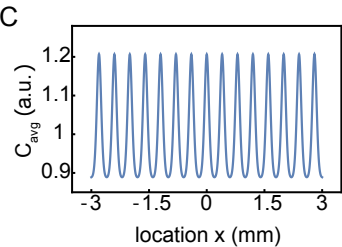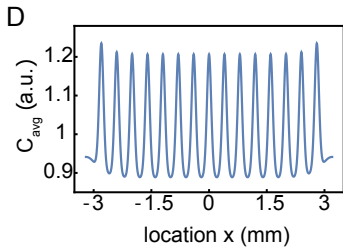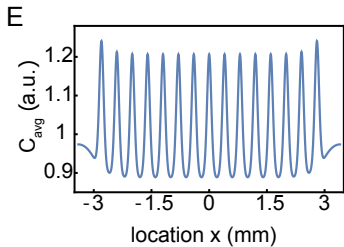

Supplement: supp [file elife-52868-supp-v1.zip]

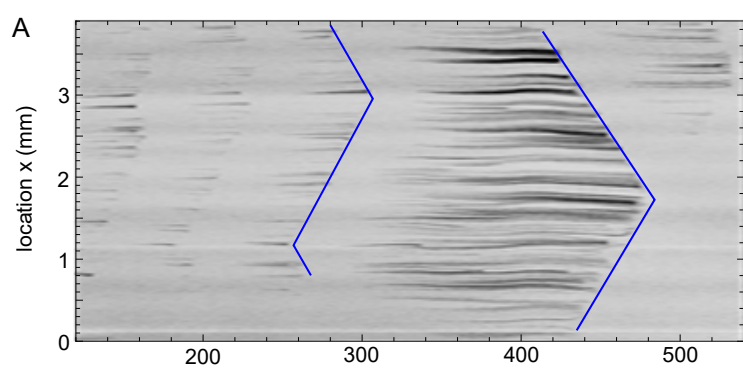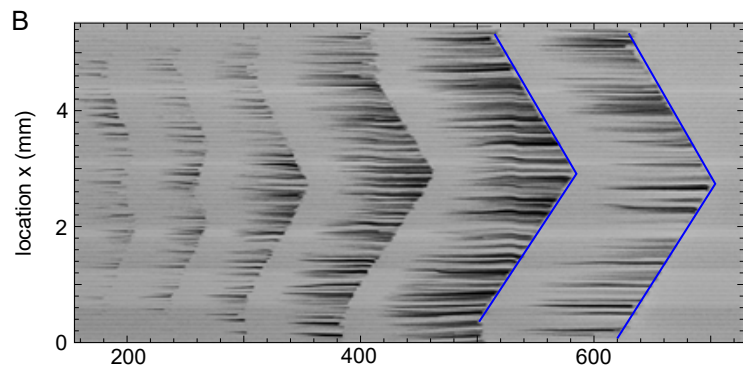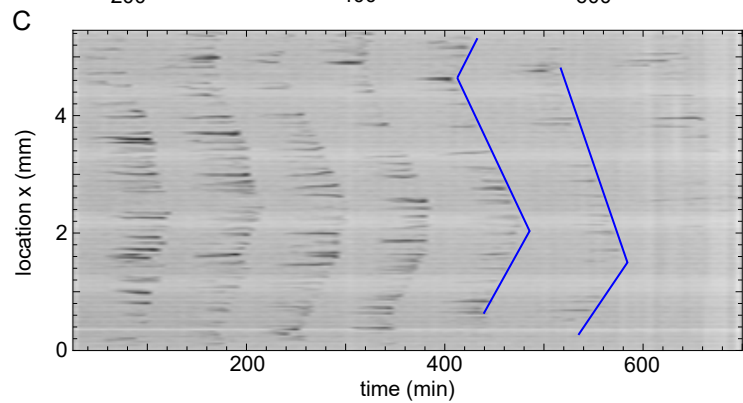

Supplement: supp [file elife-52868-supp-v1.zip]

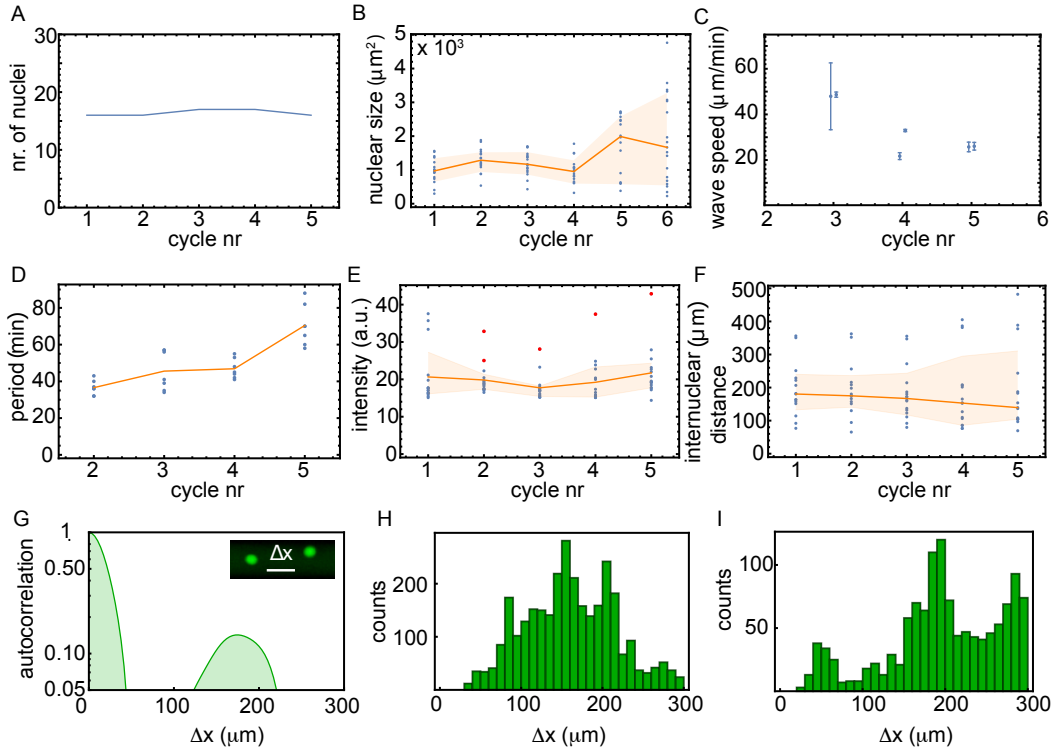

Supplement: supp [file elife-52868-supp-v1.zip]

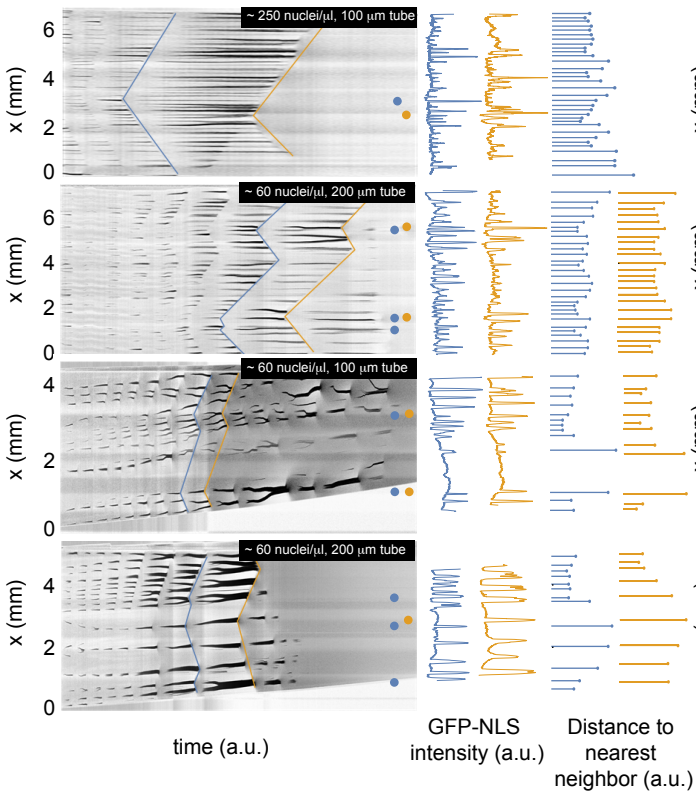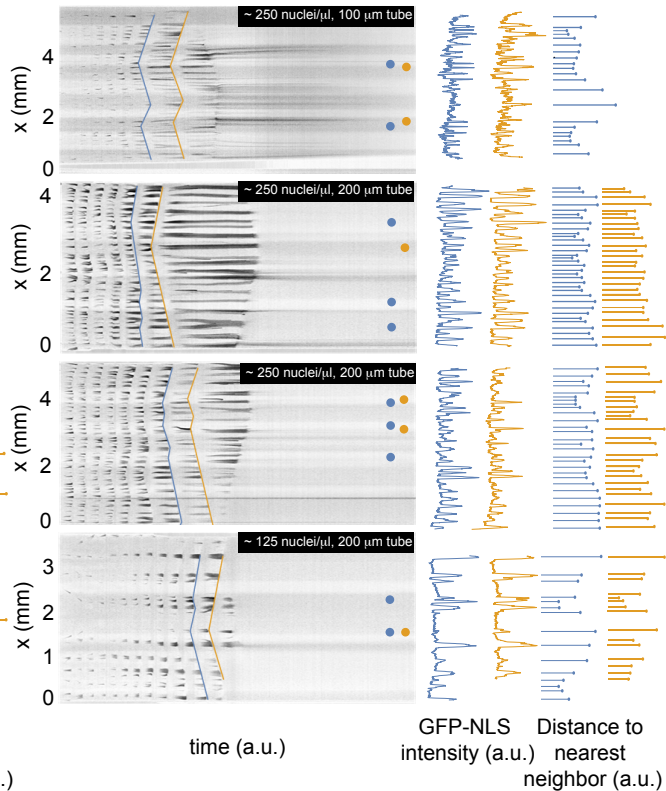

Supplement: supp [file elife-52868-supp-v1.zip]

**A**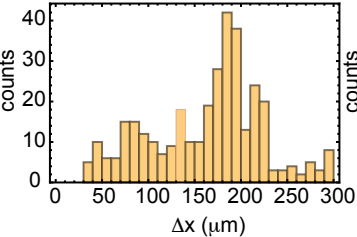**B**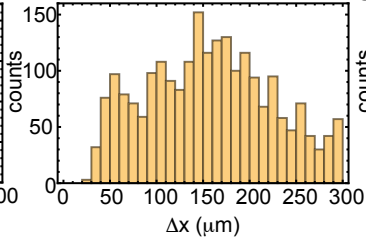**C**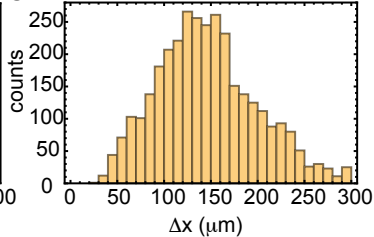

Supplement: supp [file elife-52868-supp-v1.zip]

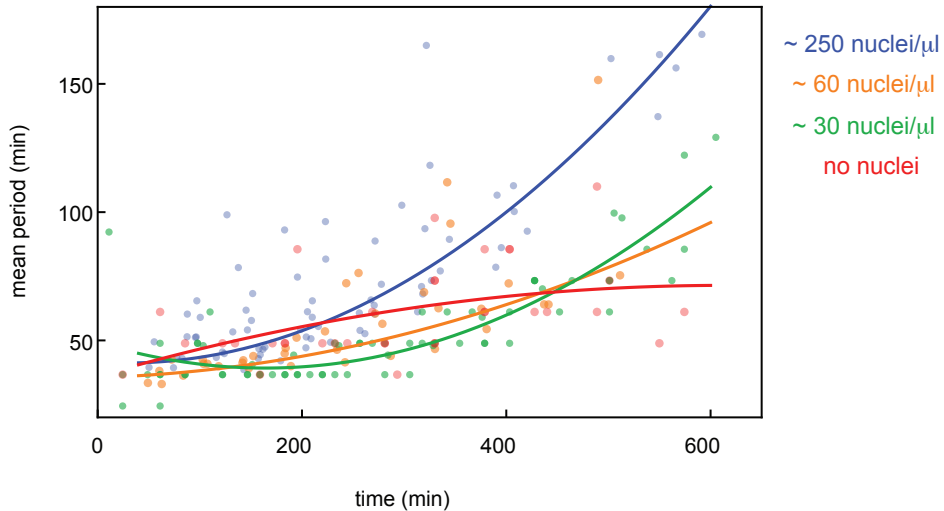

Supplement: supp [file elife-52868-supp-v1.zip]

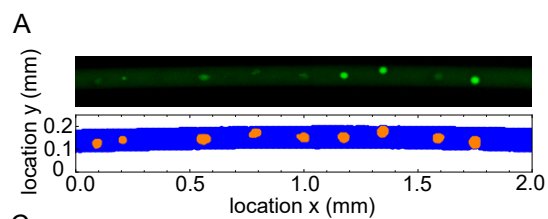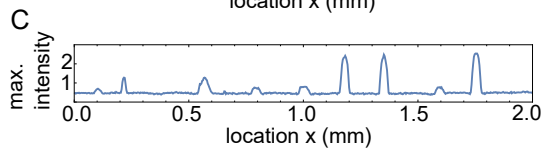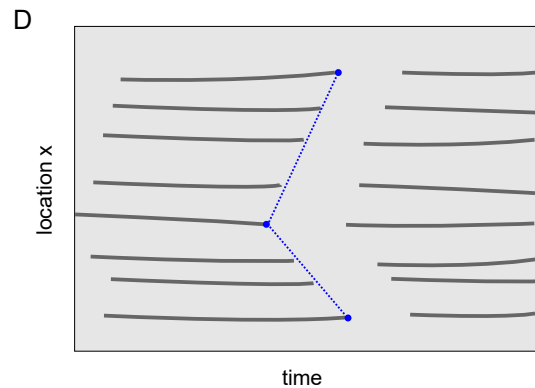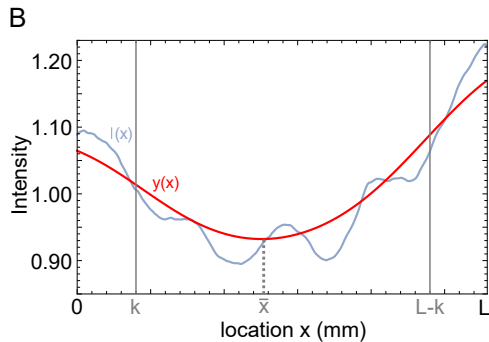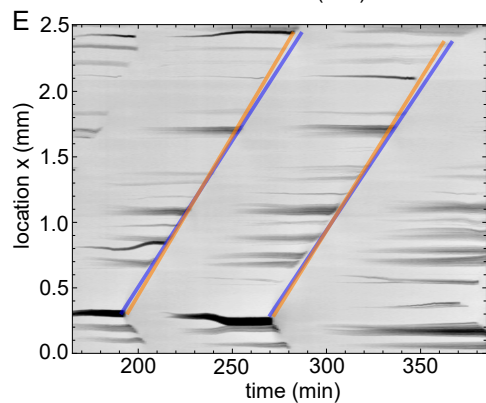

Supplement: supp [file elife-52868-supp-v1.zip]

A

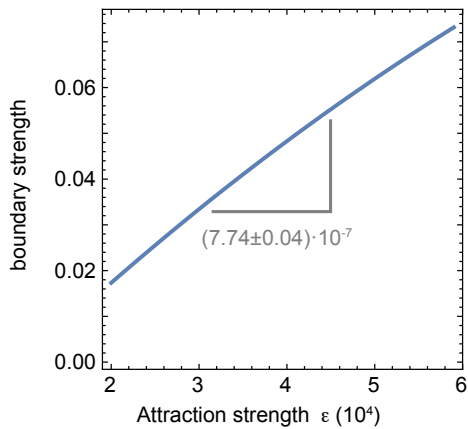

B

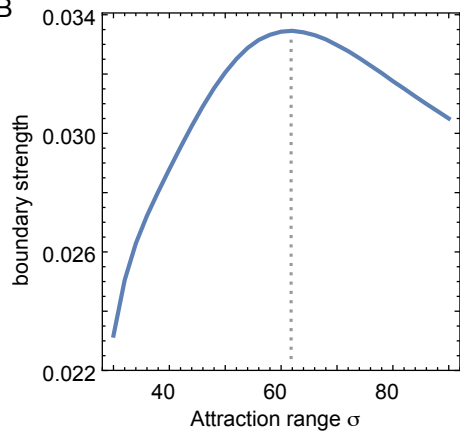

C

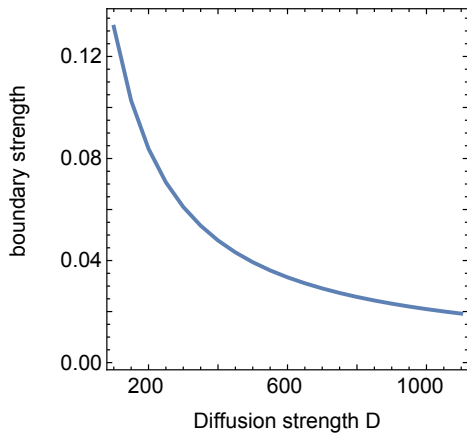

D

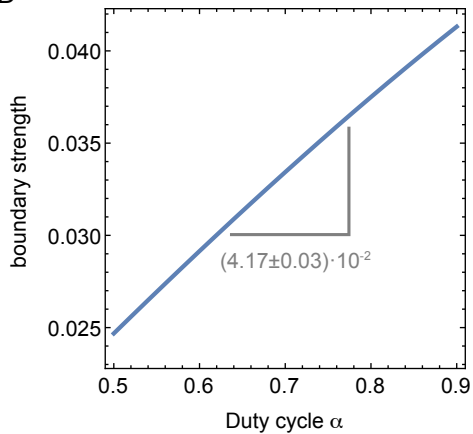

Supplement: supp [file elife-52868-supp-v1.zip]

**A** 150  $\mu\text{m}$  between nuclei

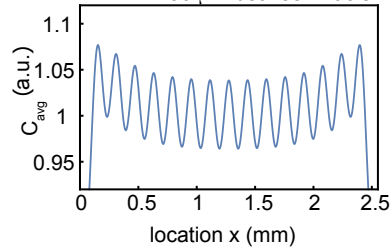

**B** 100  $\mu\text{m}$  between nuclei

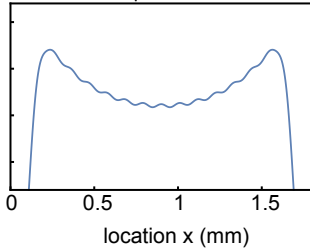

**C** 80  $\mu\text{m}$  between nuclei

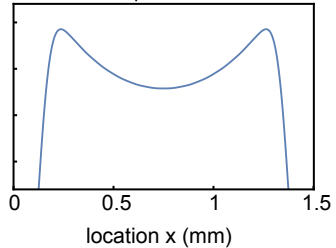

Supplement: supp [file elife-52868-supp-v1.zip]

A

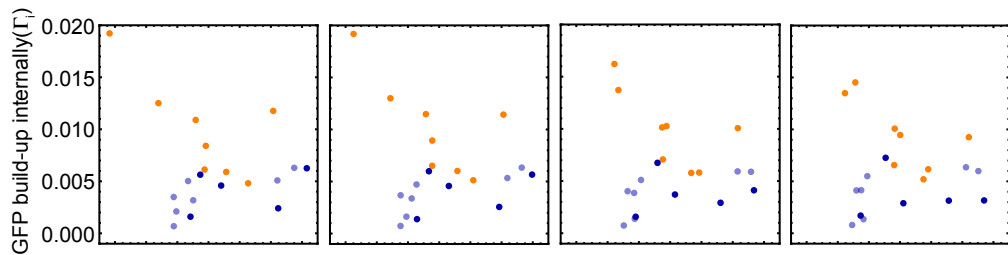

B

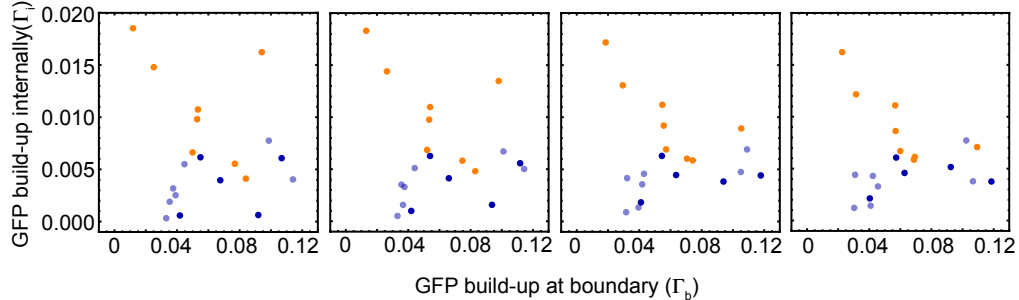

Supplement: supp [file elife-52868-supp-v1.zip]

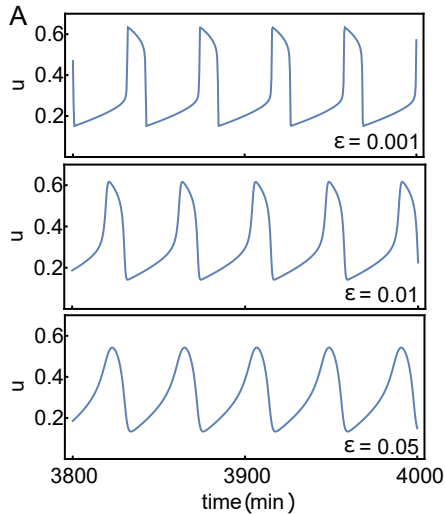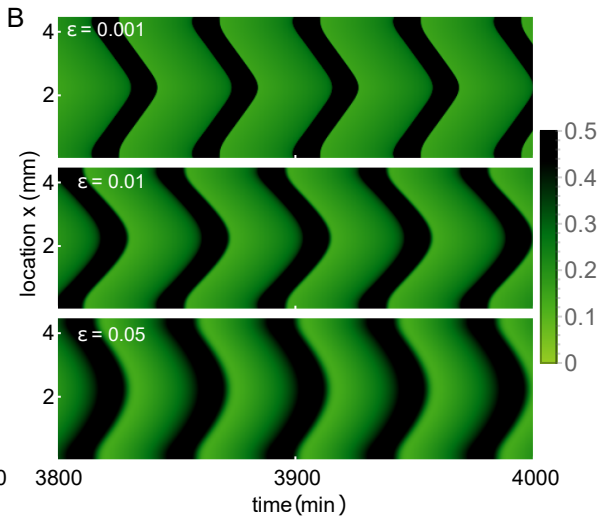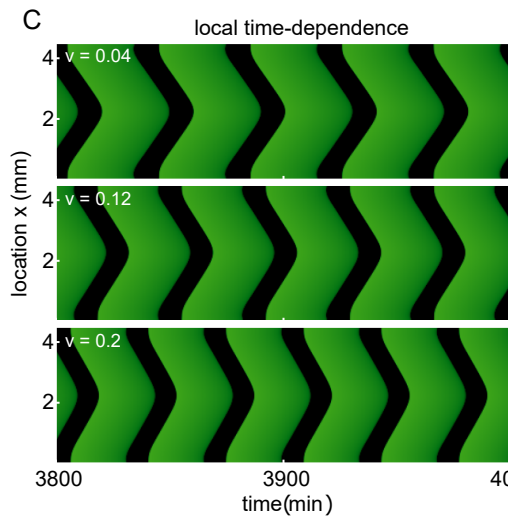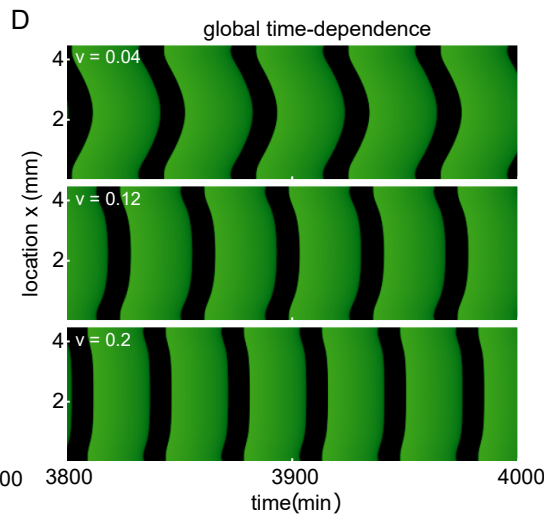

Supplement: supp [file elife-52868-supp-v1.zip]

A

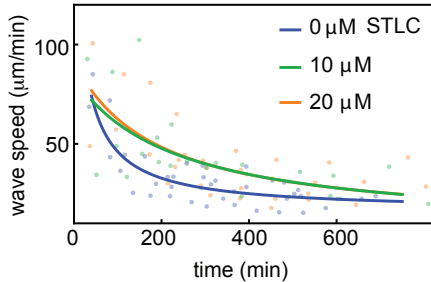

B

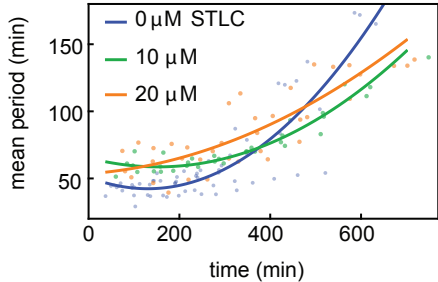

Supplement: supp [file elife-52868-supp-v1.zip]

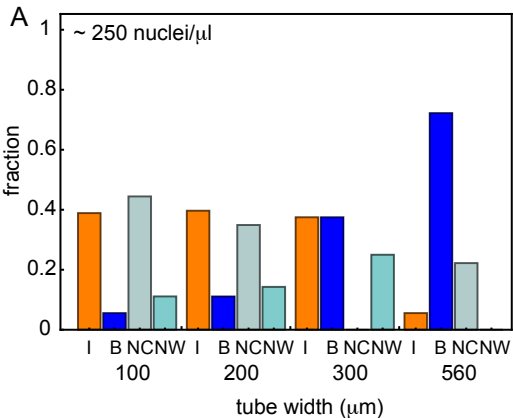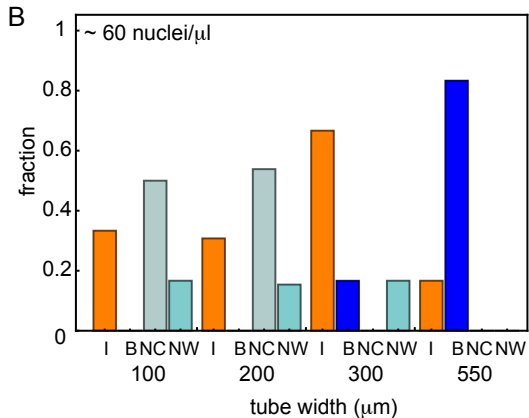

Supplement: supp [file elife-52868-supp-v1.zip]

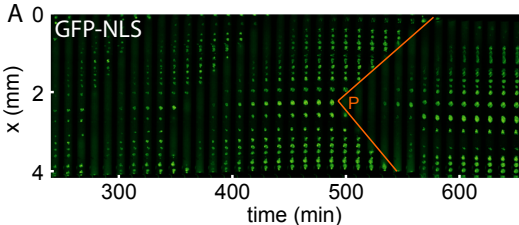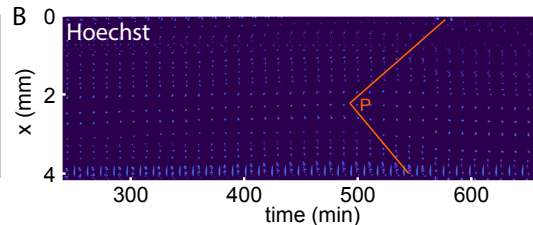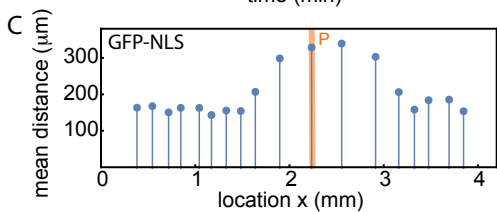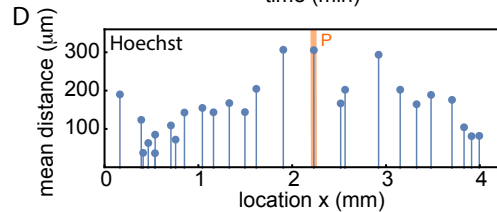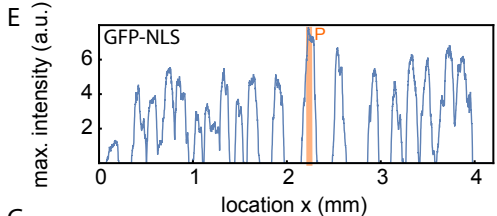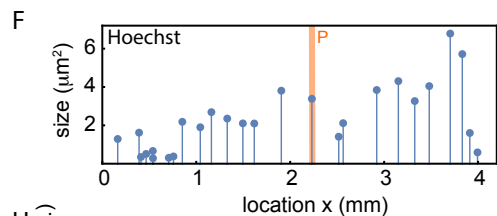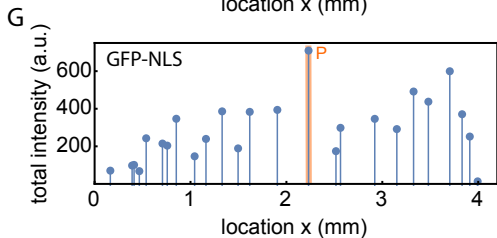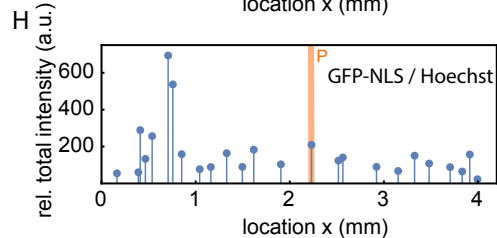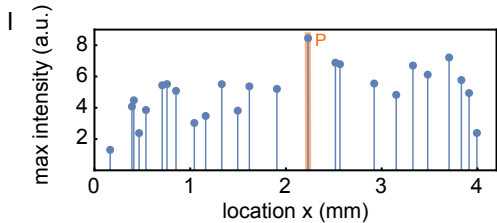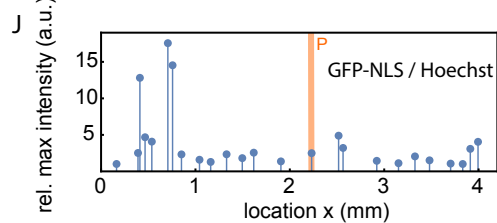

Supplement: supp [file elife-52868-supp-v1.zip]

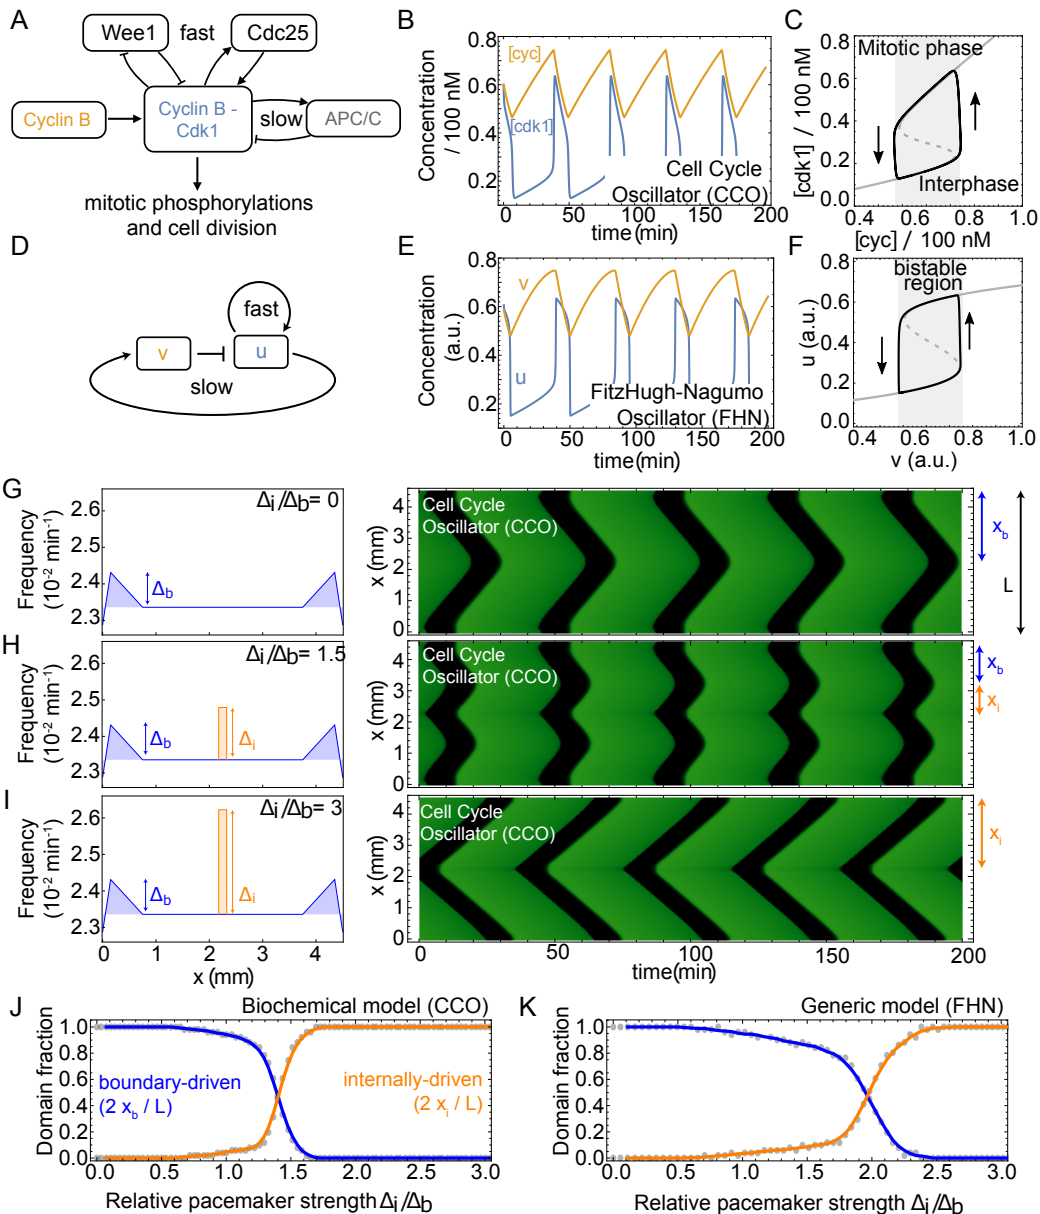

Supplement: supp [file elife-52868-supp-v1.zip]

A

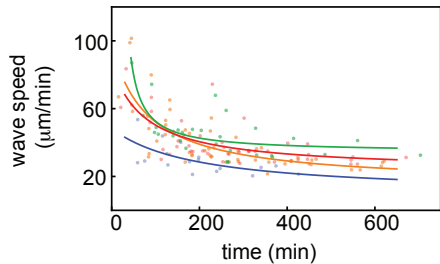

B

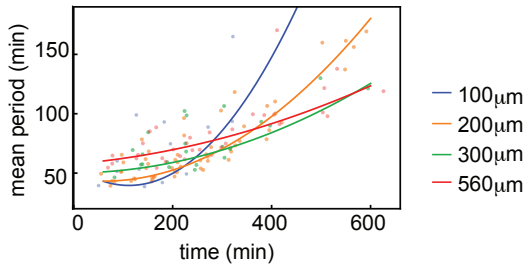

C

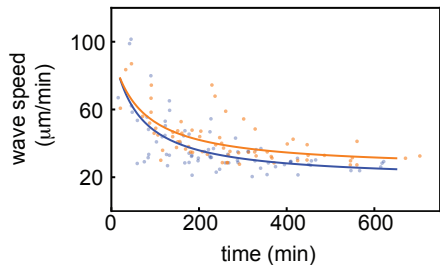

D

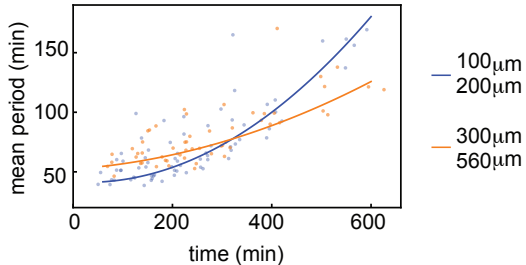

Supplement: supp [file elife-52868-supp-v1.zip]
